# Supplementary material for: Synthesis of New Chromene Derivatives Targeting Triple-Negative Breast Cancer Cells
Source: MDPI journal article supplement (doi:10.3390/cancers15102682), 2023-05-09

**Uncropped Western blot**  
**Main Body text**

**Figure 4A**

**Chromene C1**

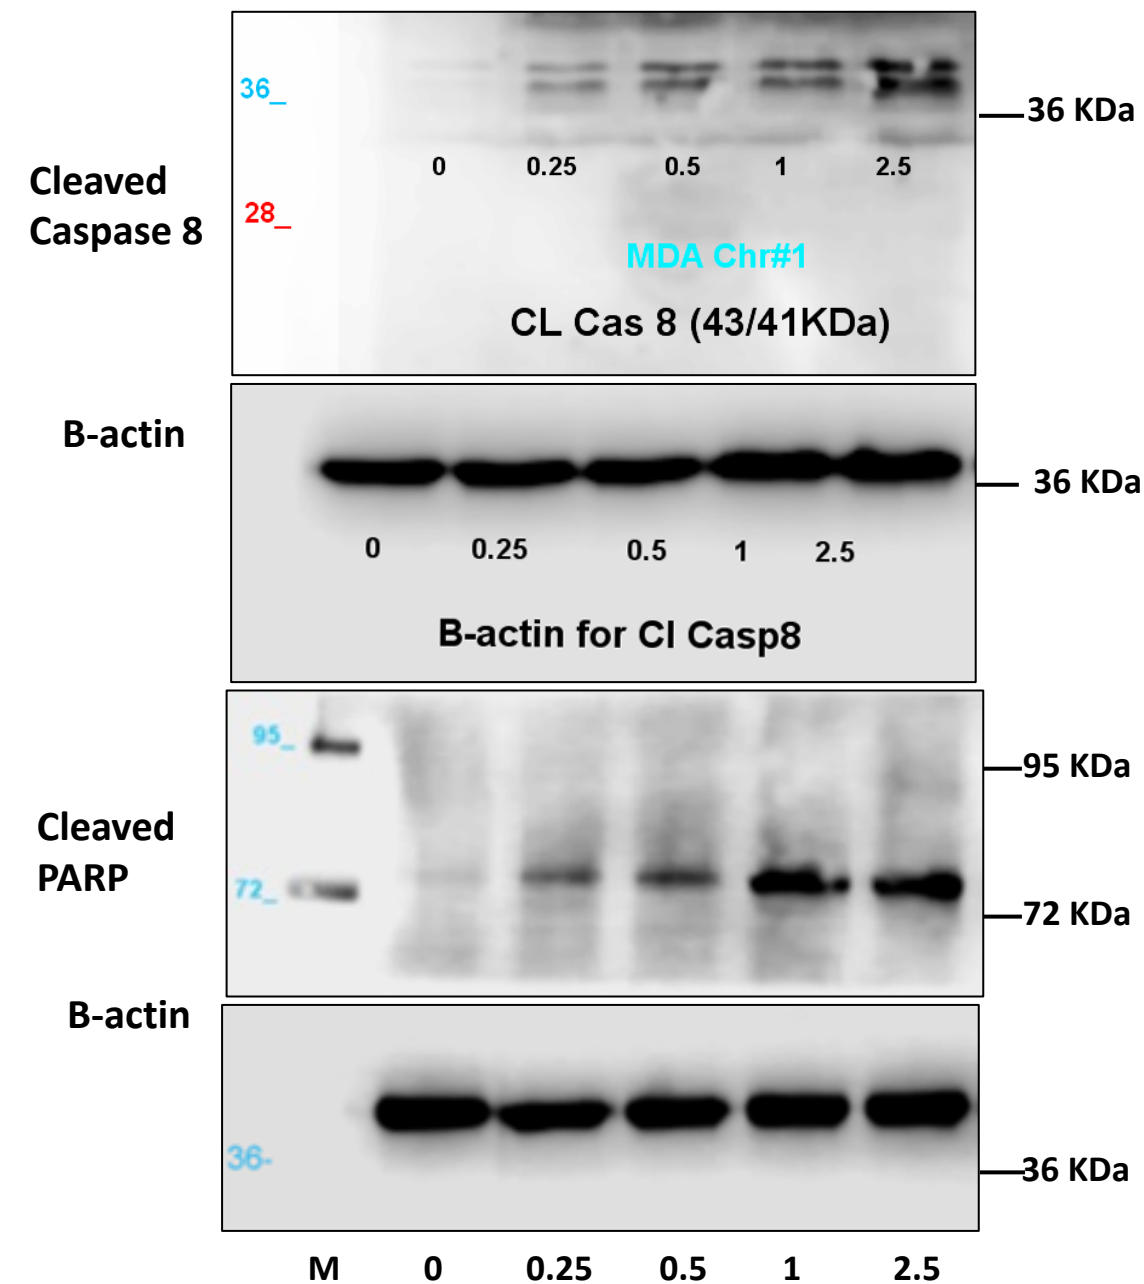

**Figure 4B**

**Chromene C2**

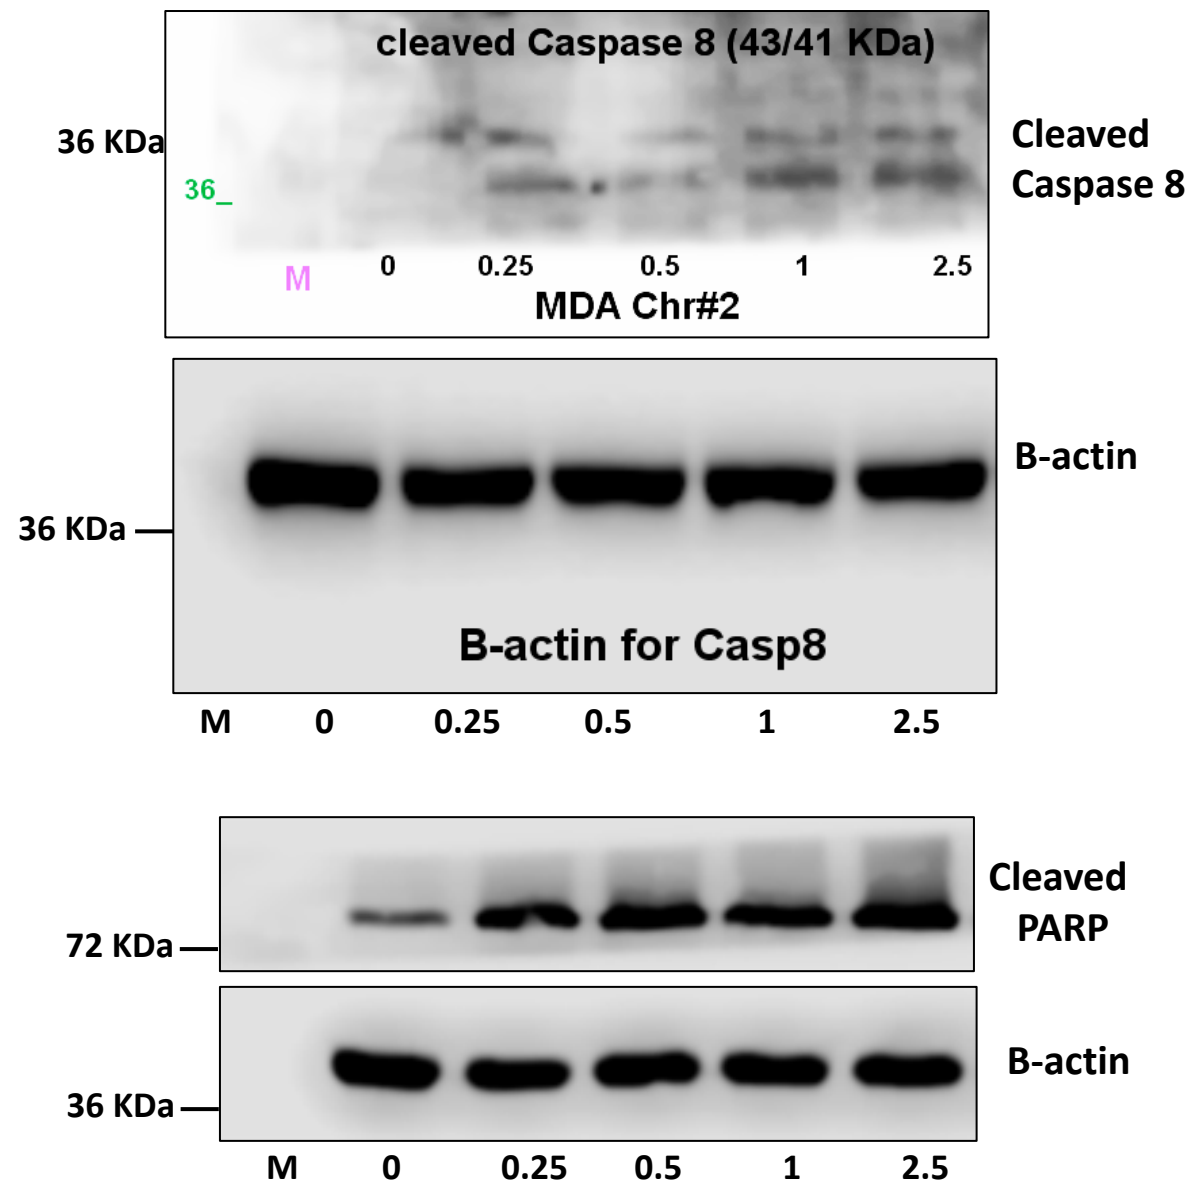

Figure 5E

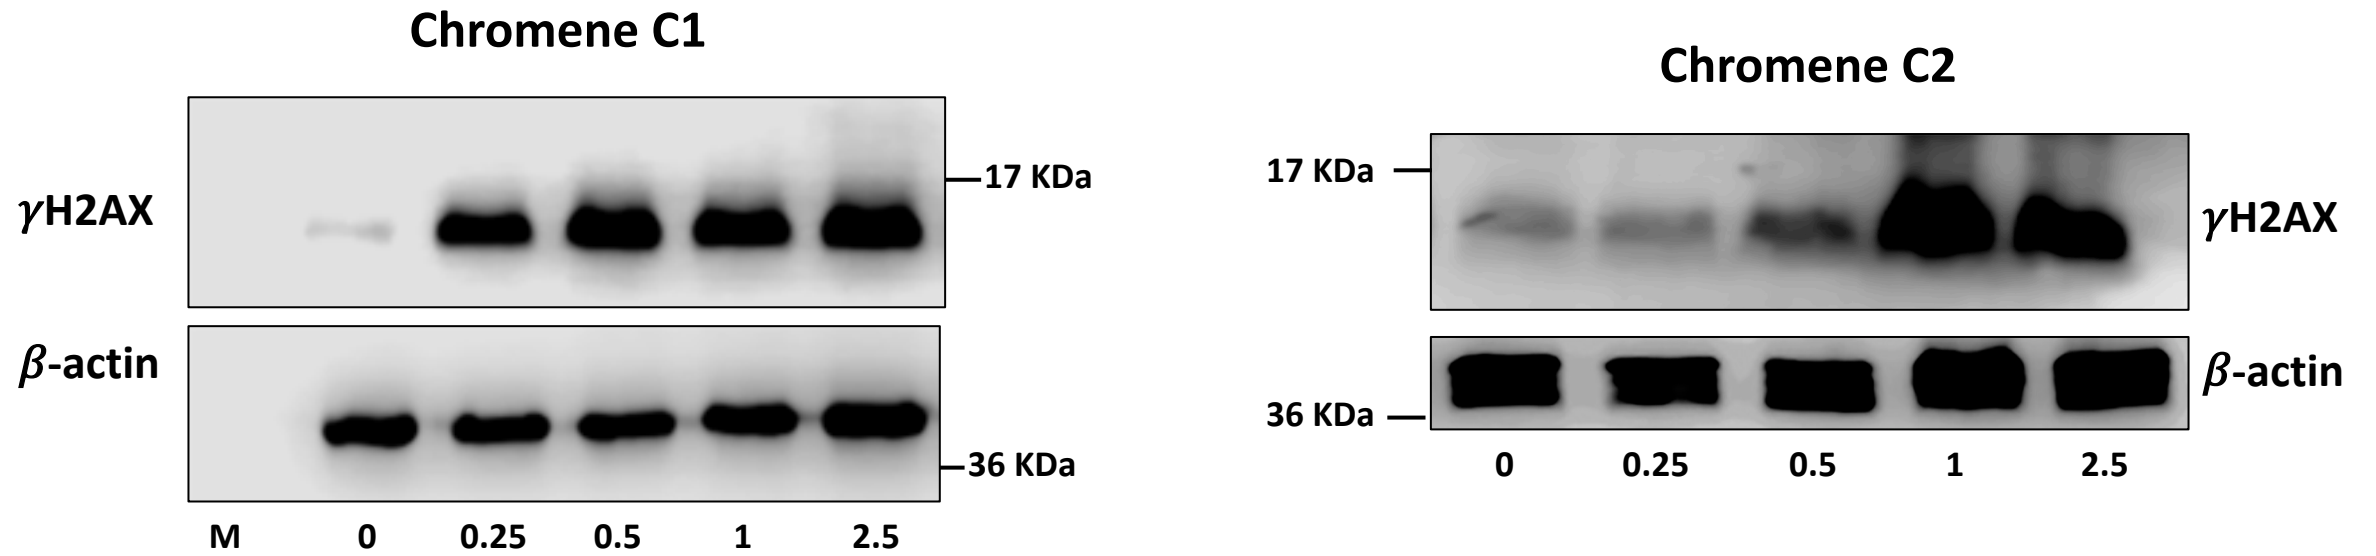

**Figure 6D**

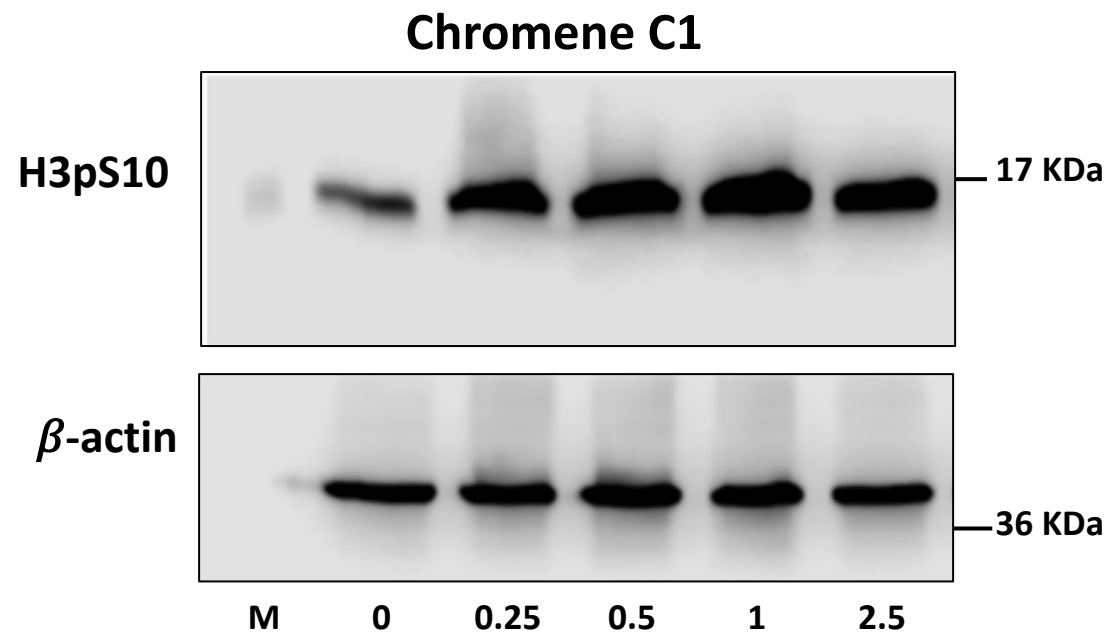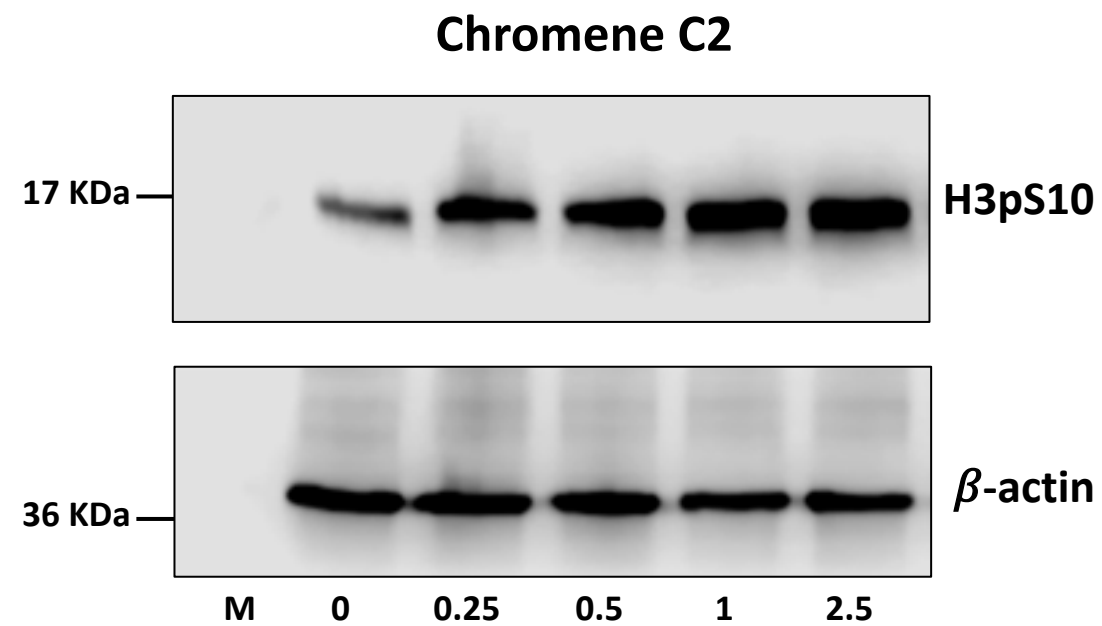

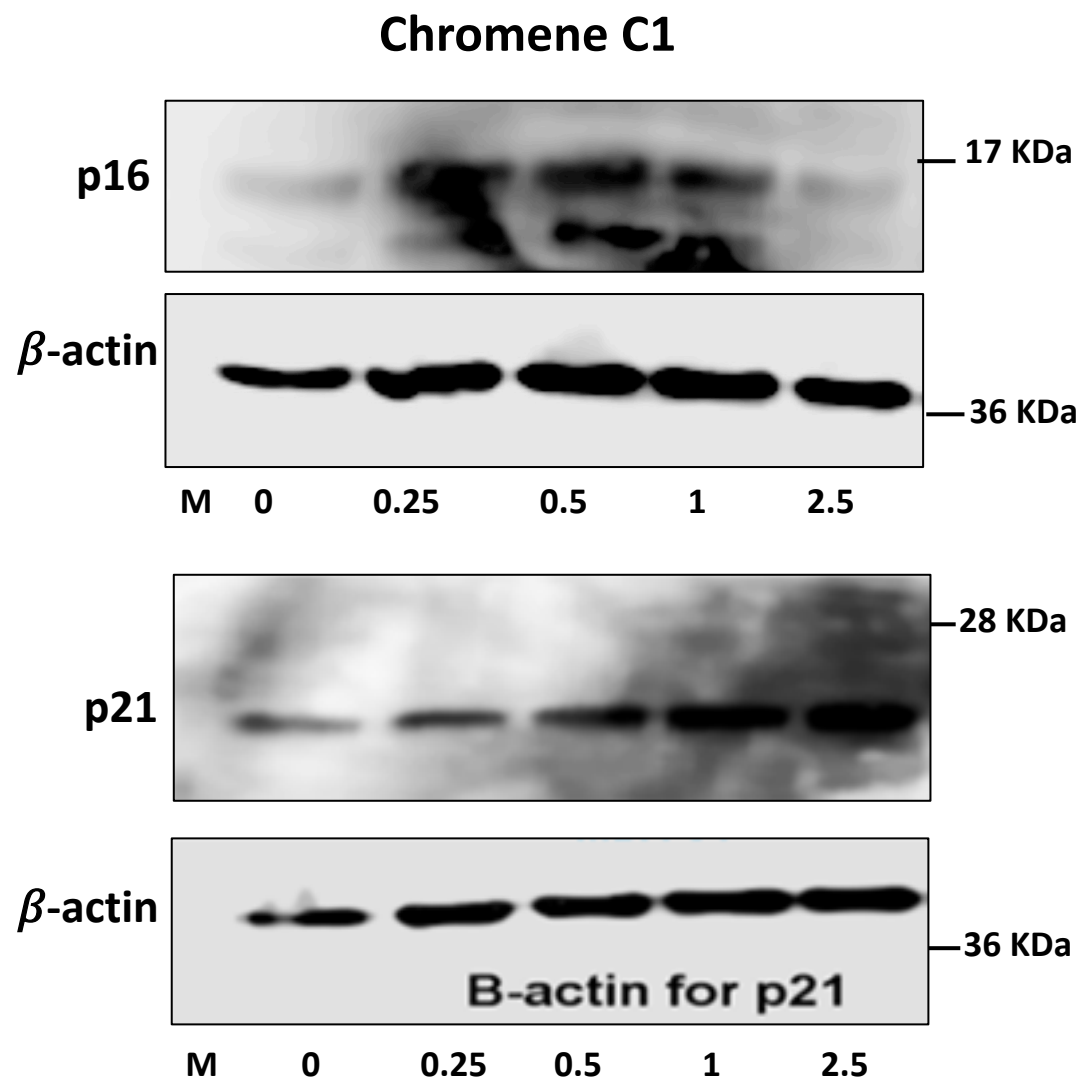

**Figure 7E**

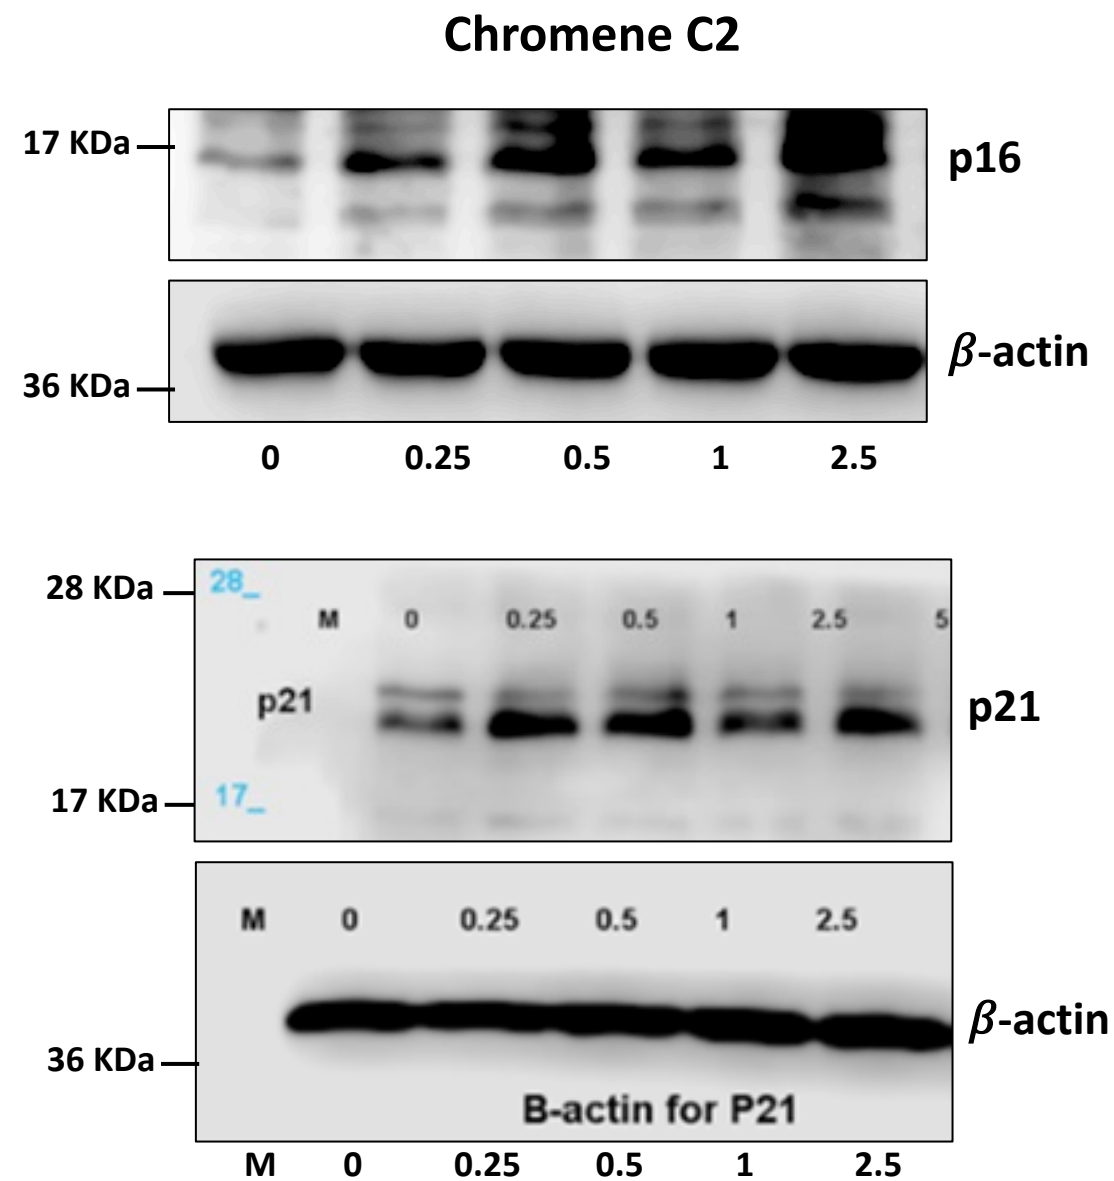

**Figure 7F**

Chromene C1

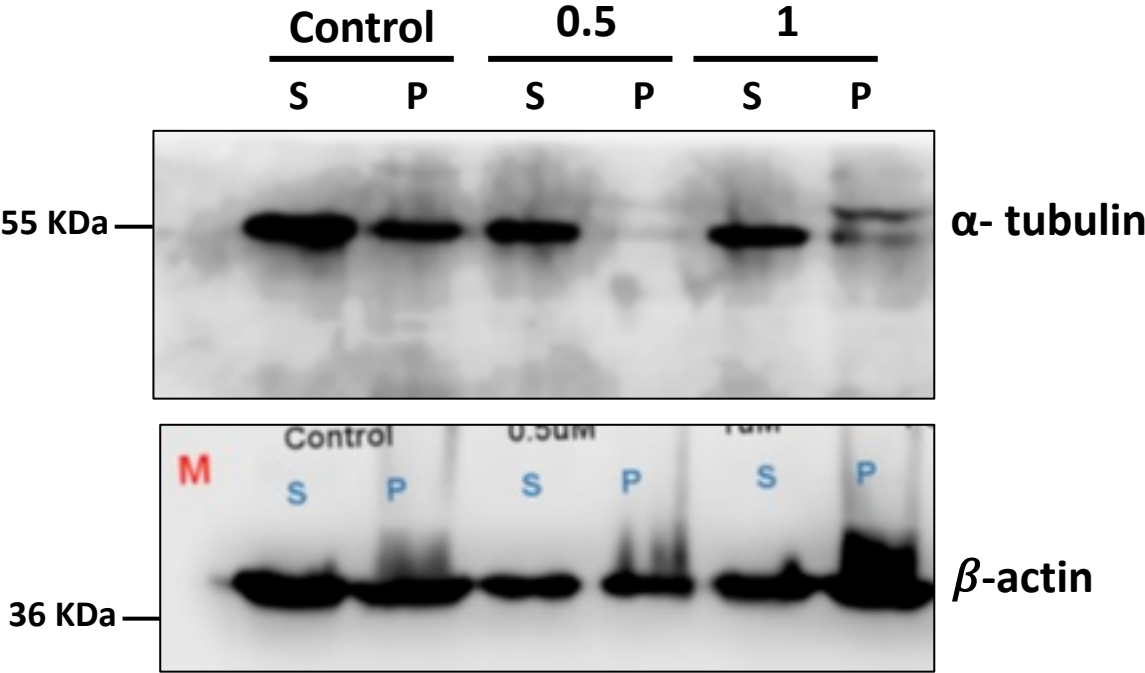

Figure 8B

Chromene C2

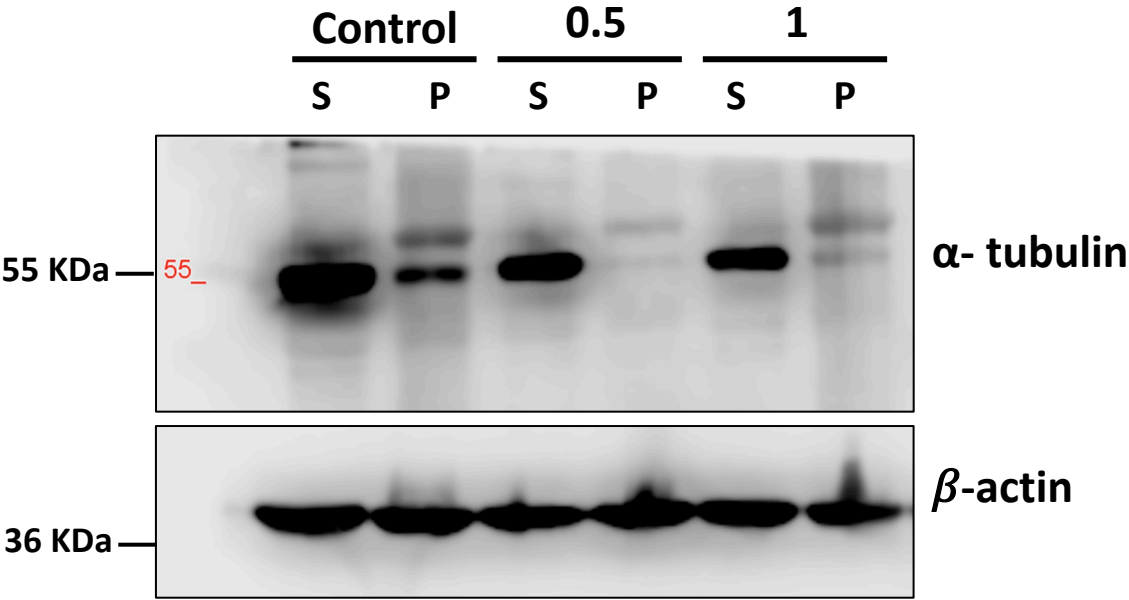

Figure 8C

**Uncropped Western blot  
(Supplementary figures)**

Figure S4A

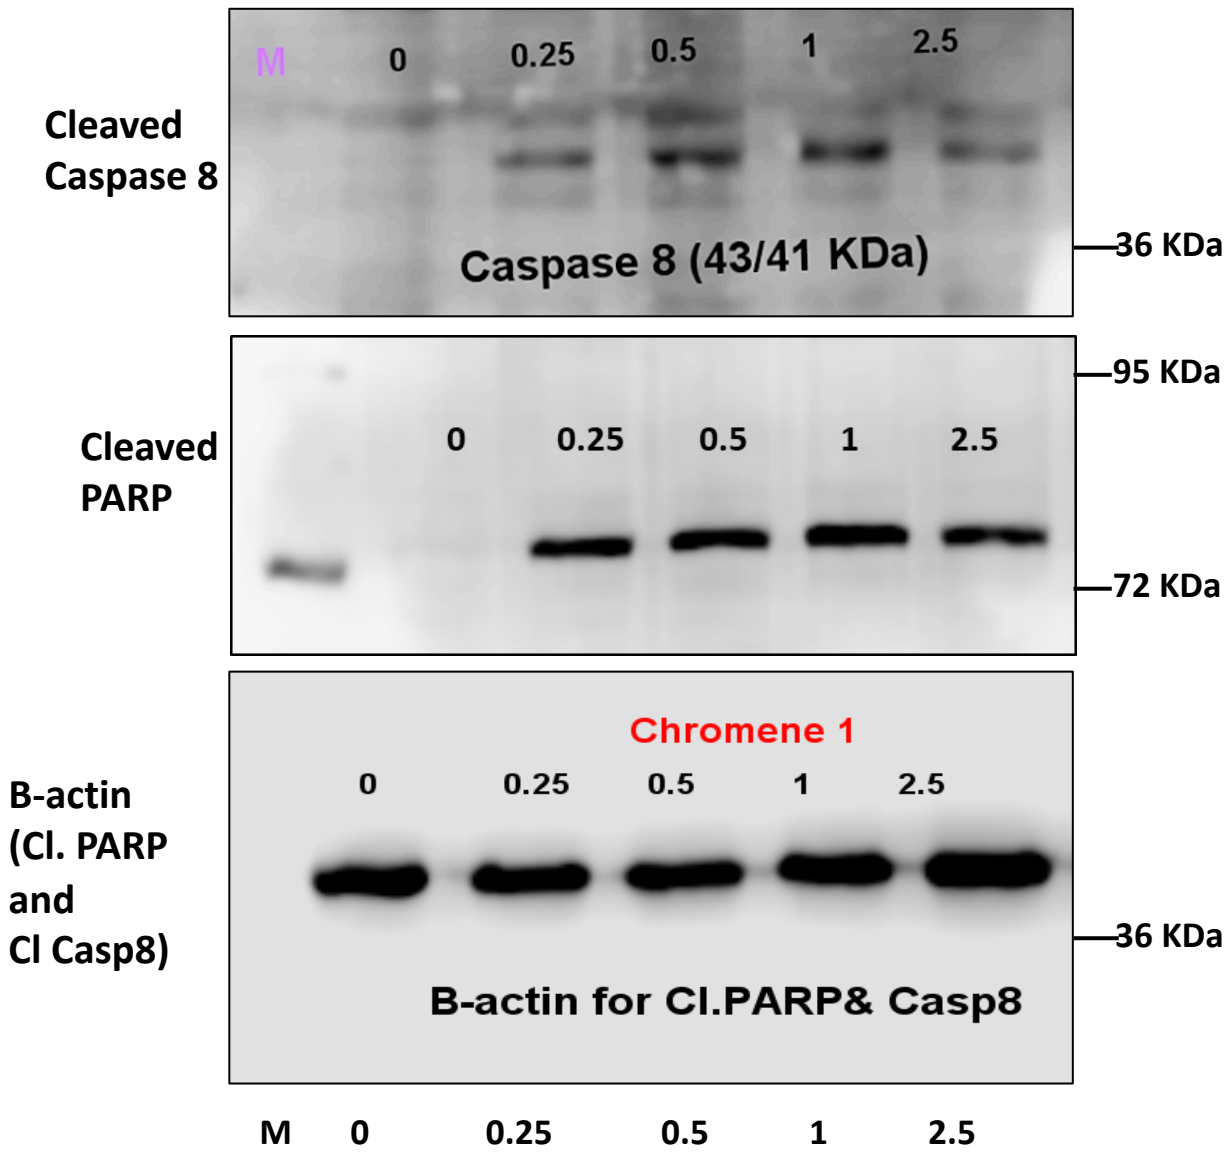

Figure S4B

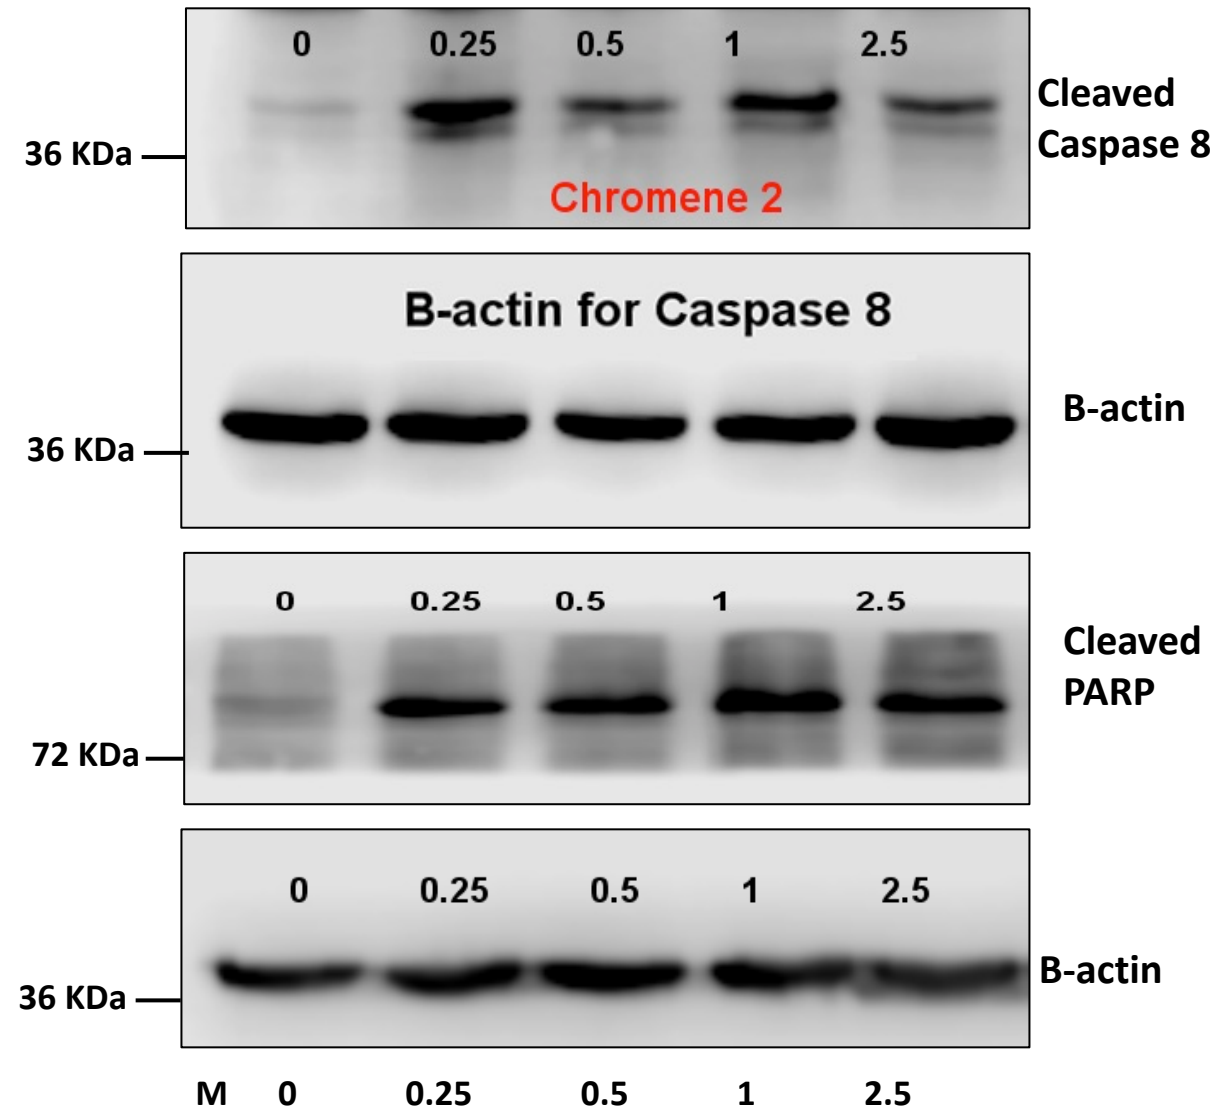



**Figure S5E**

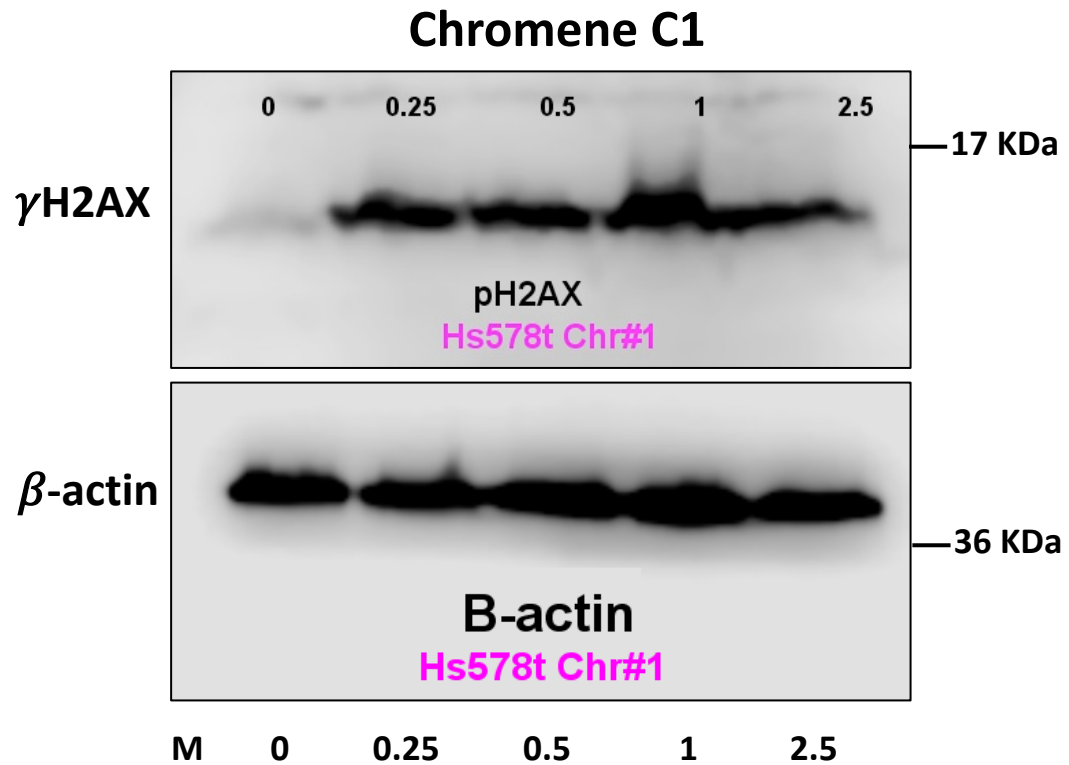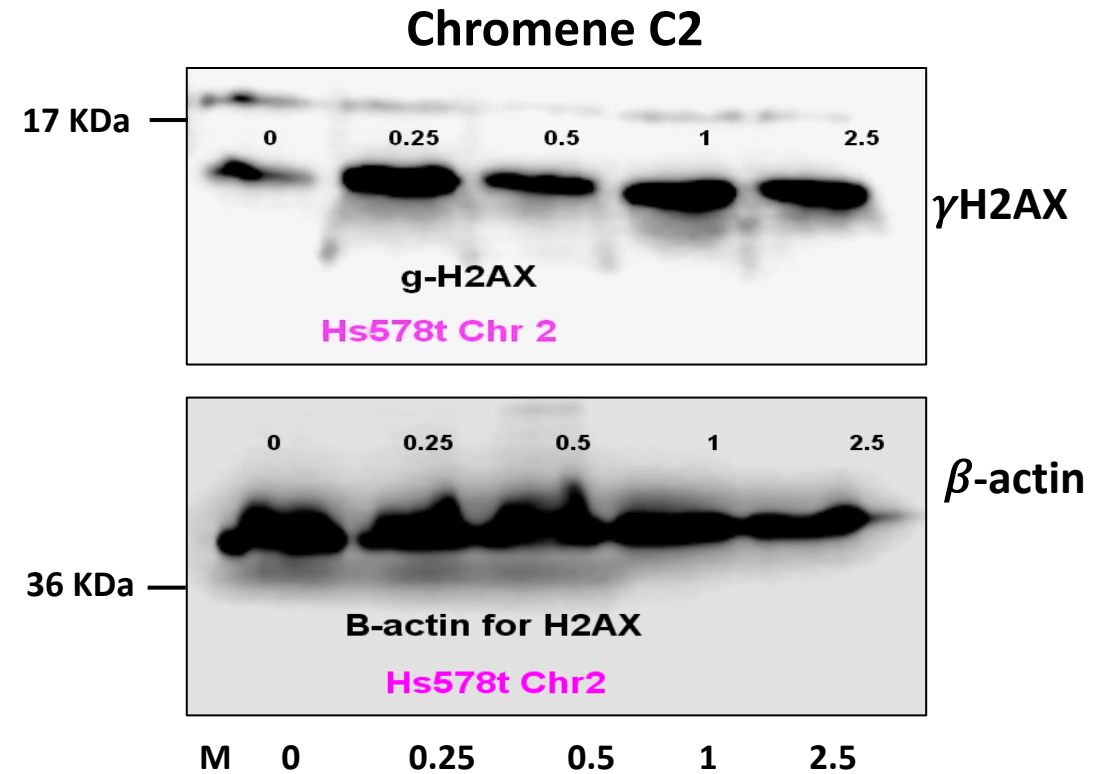

**Figure S6D**

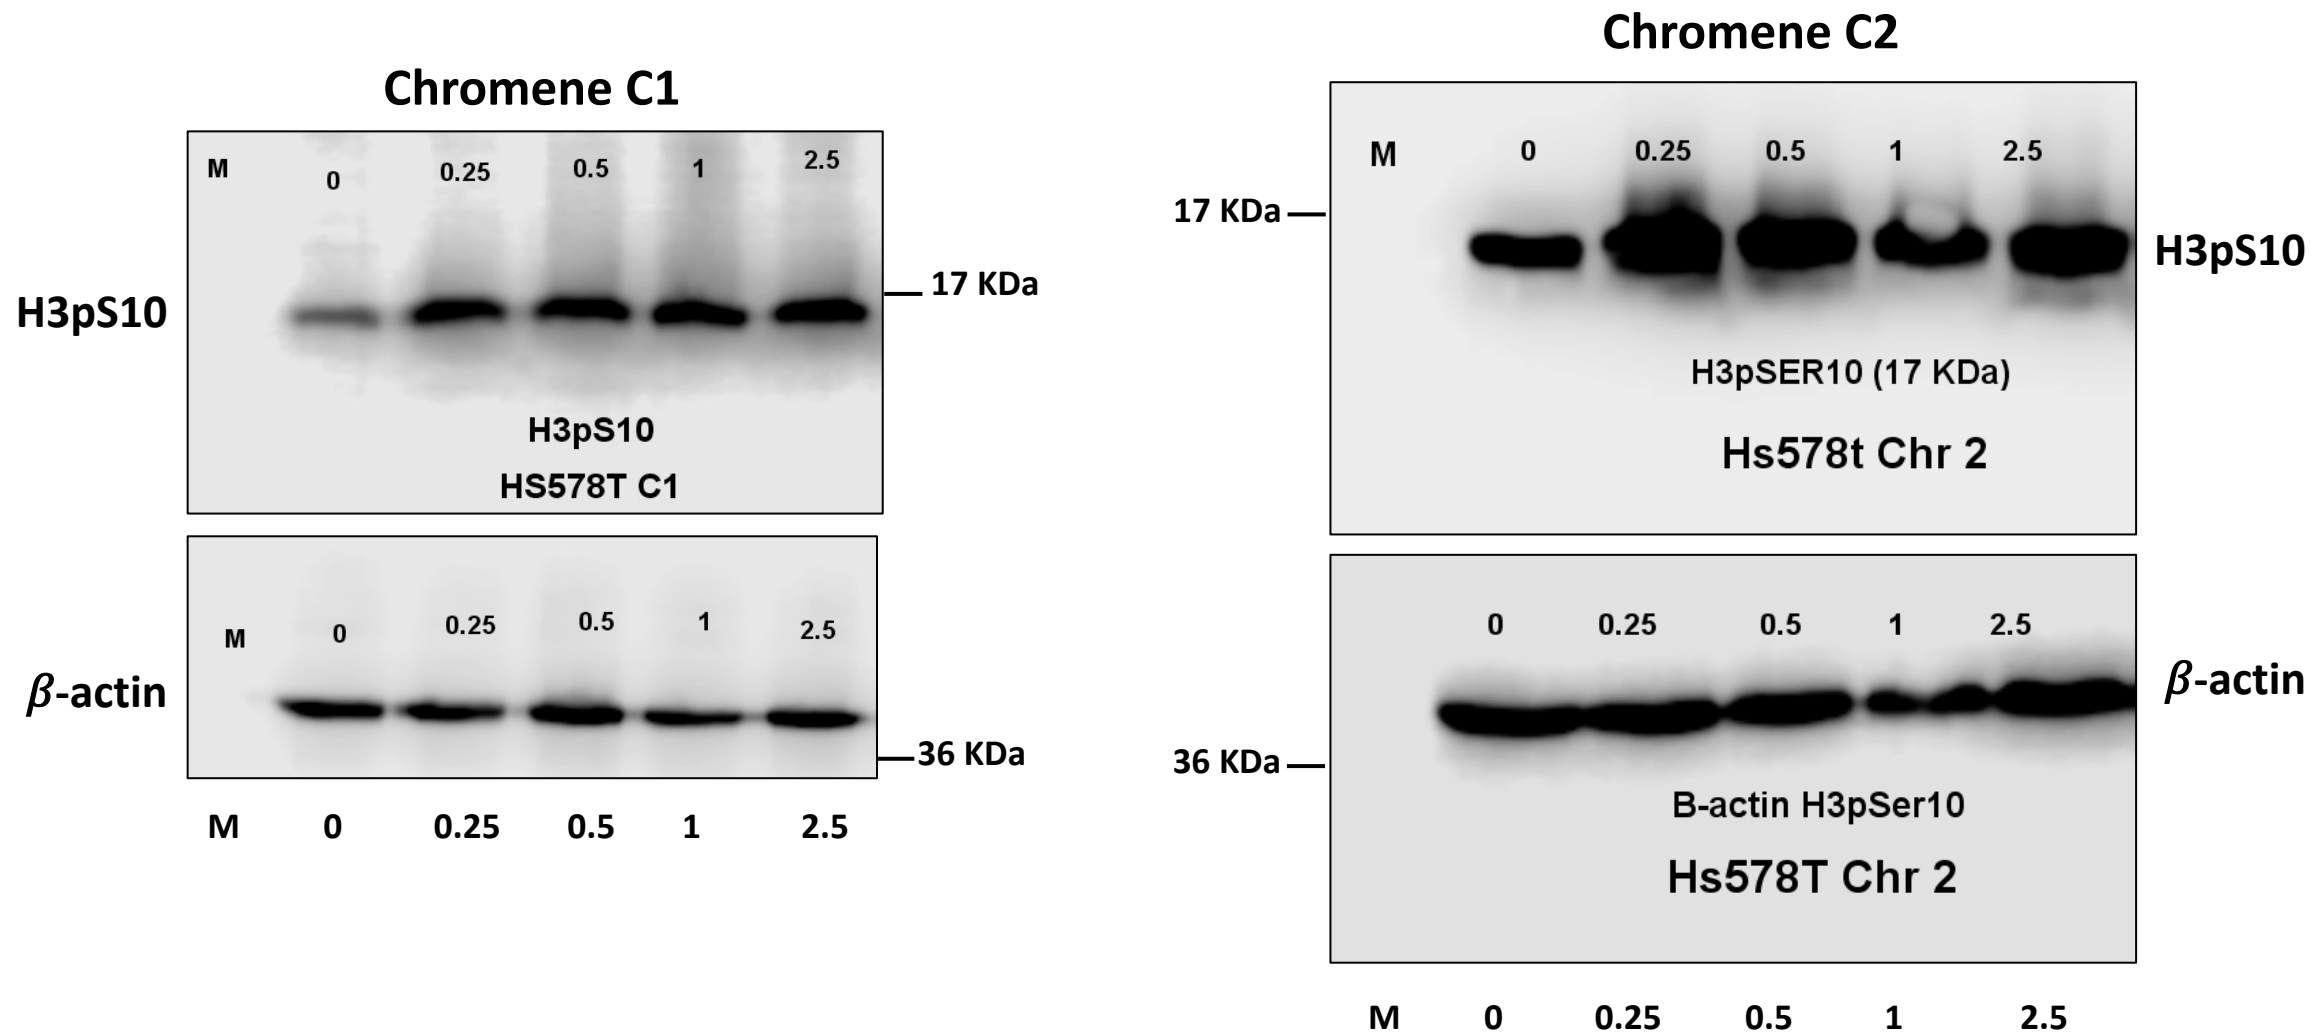

Supplement: s1 [file s1]
